# Supplementary material for: Design of template-stabilized active and earth-abundant oxygen evolution catalysts in acid
Source: Royal Society of Chemistry journal article supplement (doi:10.1039/c7sc01239j), 2017-01-01
Supplement: c7sc01239j1.pdf [file c7sc01239j1.pdf]

## Supporting Information

### **Design of template-stabilized active and earth-abundant oxygen evolution catalysts in acid**

Michael Huynh, Tuncay Ozel, Chong Liu, Eric C. Lau, Daniel G. Nocera\*

*\*Department of Chemistry and Chemical Biology, Harvard University,  
Cambridge, MA 02138, United States.*

dnocera@fas.harvard.edu

| <i>Index</i>                                                                                                                                 | <i>Page</i> |
|----------------------------------------------------------------------------------------------------------------------------------------------|-------------|
| <b>Figure S1.</b> CVs of Co <sup>2+</sup> , Ni <sup>2+</sup> , Fe <sup>2+</sup> , Mn <sup>2+</sup> , Pb <sup>2+</sup> , and Ir <sup>3+</sup> | S3          |
| <b>Figure S2.</b> OER stability of unary metal oxides in P <sub>i</sub> at pH 2.5                                                            | S4          |
| <b>Figure S3.</b> Faradaic efficiency of OER on CoMnO <sub>x</sub> and CoFePbO <sub>x</sub> by GC                                            | S5          |
| <b>Figure S4.</b> EDS elemental maps of CoMnO <sub>x</sub> (0.65 and 1.15 V) and CoPbO <sub>x</sub>                                          | S6          |
| <b>Figure S5.</b> STEM images of CoMnO <sub>x</sub> and CoFePbO <sub>x</sub>                                                                 | S7          |
| <b>Figure S6.</b> PXRD patterns of CoMnO <sub>x</sub> and CoFePbO <sub>x</sub>                                                               | S8          |
| <b>Figure S7.</b> High-resolution XPS of Fe 2p comparing CoFePbO <sub>x</sub> and Fe <sub>2</sub> O <sub>3</sub>                             | S9          |
| <b>Figure S8.</b> Pourbaix diagrams of Co, Mn, Pb, and Fe oxides                                                                             | S10         |
| <b>Table S1.</b> Elemental analysis of CoMnO <sub>x</sub> , CoPbO <sub>x</sub> , and CoFePbO <sub>x</sub> films                              | S11         |

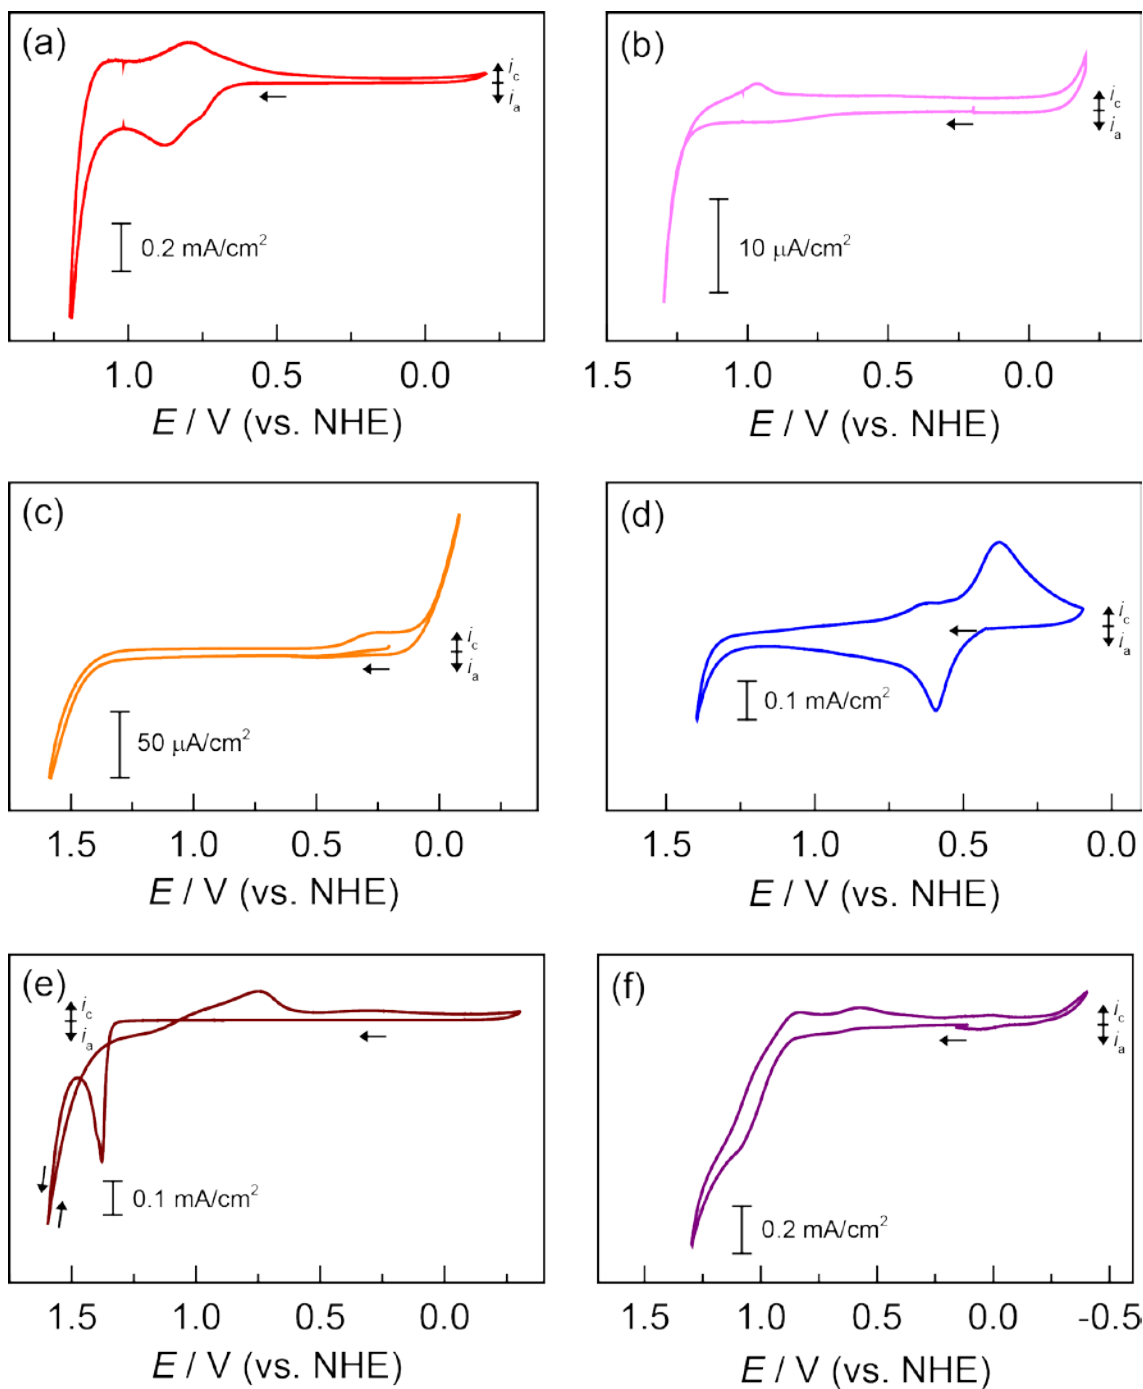

**Figure S1.** Cyclic voltammograms of a 1 cm<sup>2</sup> FTO electrode at 50 mV/s in 0.5 mM of: (a) Co<sup>2+</sup> (red —), (b) Ni<sup>2+</sup> (light magenta —), (c) Fe<sup>2+</sup> (orange —), (d) Mn<sup>2+</sup> (blue —), (e) Pb<sup>2+</sup> (brown —), and (f) Ir<sup>3+</sup> (purple —). All metal ions were buffered with 50 mM MePi at pH 8.0 except for Fe<sup>2+</sup> (which was deposited at 75 °C in 1.0 M KNO<sub>3</sub>) and Ir<sup>3+</sup> (which was deposited in an oxalate/carbonate buffer at pH 10.5).

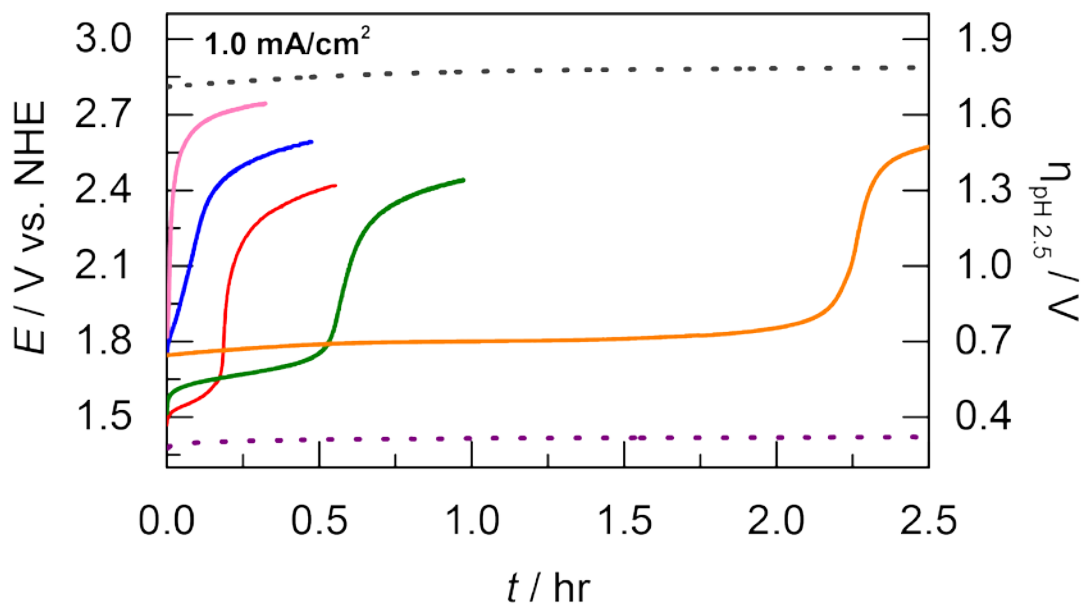

**Figure S2.** Electrochemical stability for acidic OER measured by sustained chronoamperometry at  $1.0 \text{ mA/cm}^2$  in  $0.10 \text{ M Pi}$  and  $1.0 \text{ M KNO}_3$  solution at pH 2.5 for: MnCoOx deposited at  $0.90 \text{ V}$  (dark green —), CoOx (red —), MnOx (blue —), FeOx (orange —), NiOx (light magenta —), IrOx (purple •••), and FTO (grey •••). The inflection of potential in the plots indicates film dissolution.

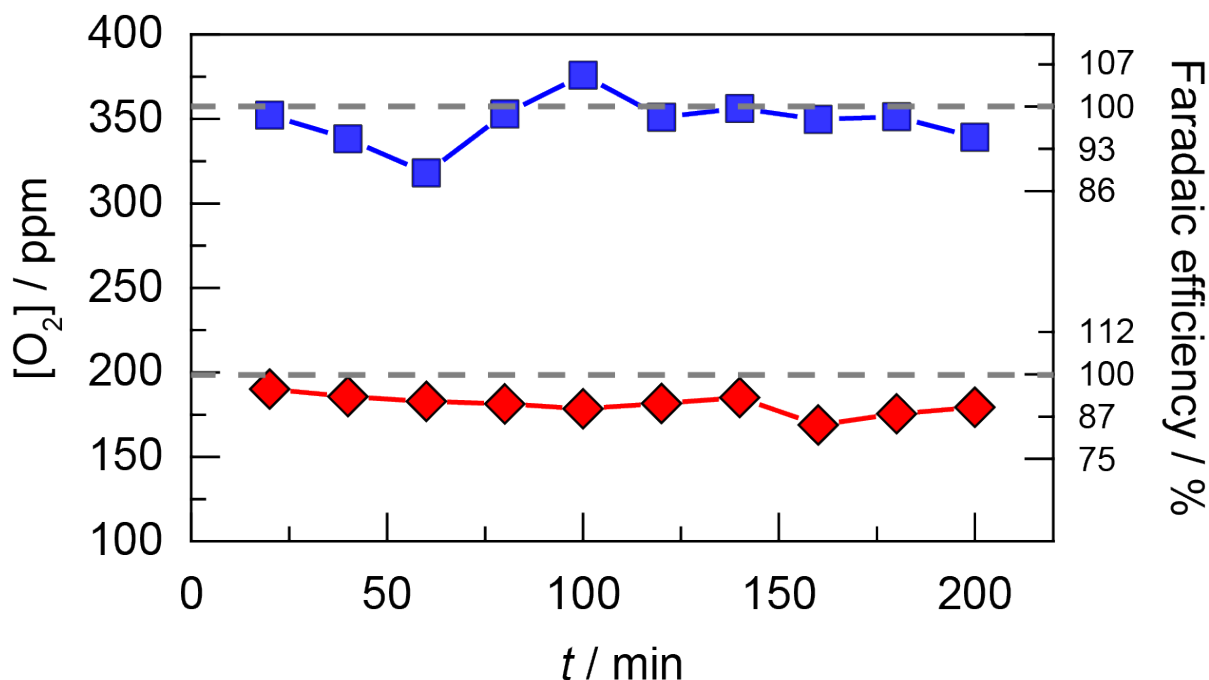

**Figure S3.** Measured oxygen concentration and corresponding faradaic efficiency of OER in 0.5 M  $\text{P}_i$  solution at pH 2.5 on  $\text{CoMnO}_x$  operated at  $0.1 \text{ mA/cm}^2$  (red,  $\blacklozenge$ ) and  $\text{CoFePbO}_x$  operated at  $1.0 \text{ mA/cm}^2$  (blue,  $\blacksquare$ ).  $\text{O}_2$  was detected by gas chromatography in 20 min snapshots and theoretical  $\text{O}_2$  concentrations (grey, — —) are calculated from the charge passed during chronoamperometry assuming 100% Faradaic efficiency. The average efficiency for  $\text{CoMnO}_x$  and  $\text{CoFePbO}_x$  is 91 and 97%, respectively.

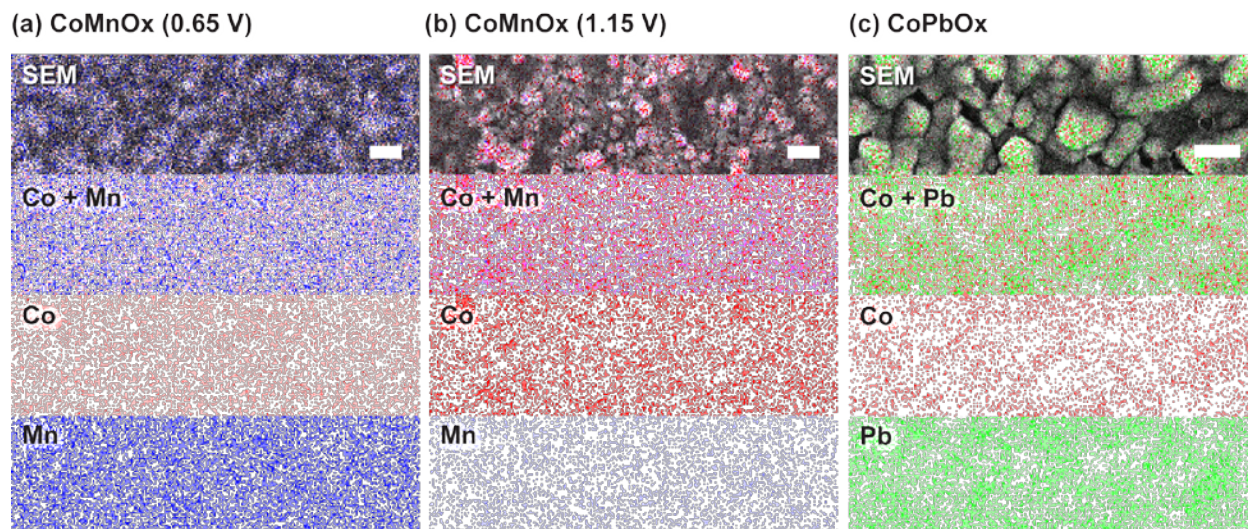

**Figure S4.** EDS elemental maps recorded through SEM of: (a) CoMnOx (deposited at 0.65 V), (b) CoMnOx (deposited at 1.15 V), and (c) CoPbOx. Individual elemental channels for Co (red), Mn (blue), and Pb (green) were combined and overlaid on the respective SEM image. All samples were prepared on FTO substrate, and scale bars are 200 nm for CoMnOx and 100 nm for CoPbOx.

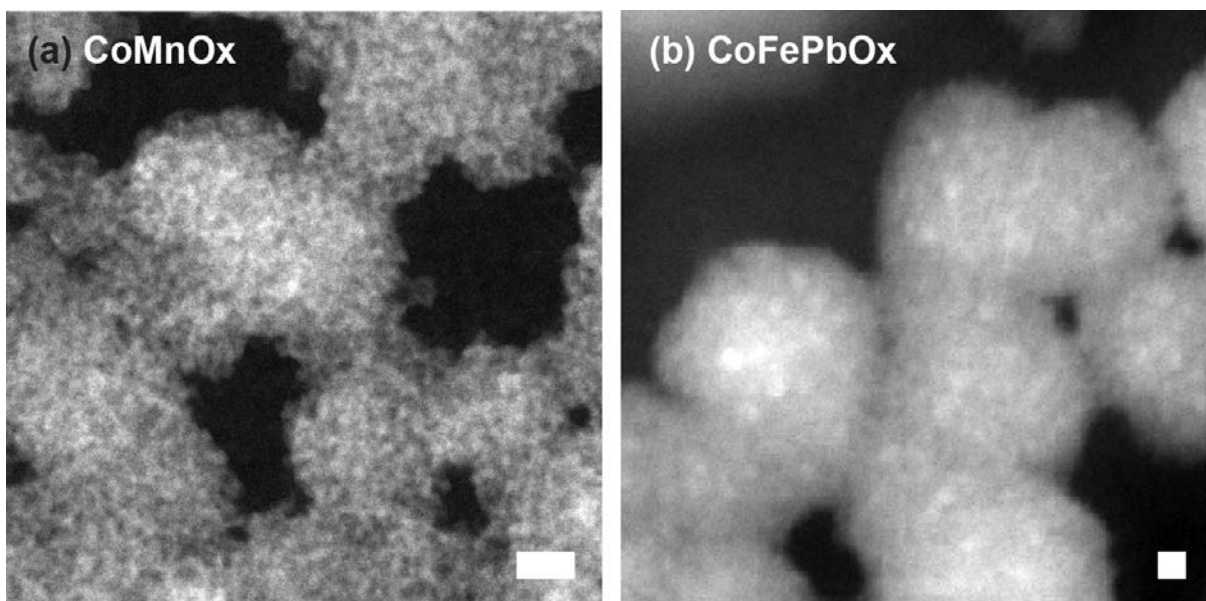

**Figure S5.** STEM image of (a) CoMnOx and (b) CoFePbOx electrodeposited directly on a carbon mesh TEM grid. Scale bar is 10 nm.

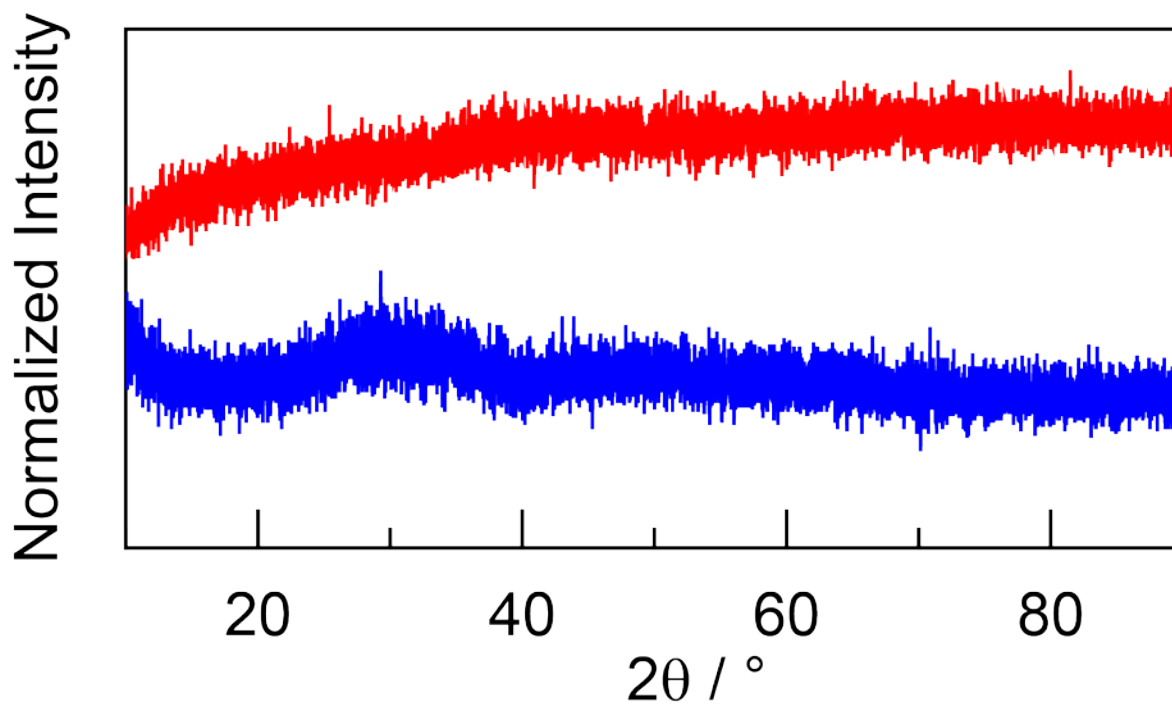

**Figure S6.** X-ray diffraction patterns of CoMnOx (red, —) and CoFePbOx (blue, —) powders, originally prepared as thin films on FTO.



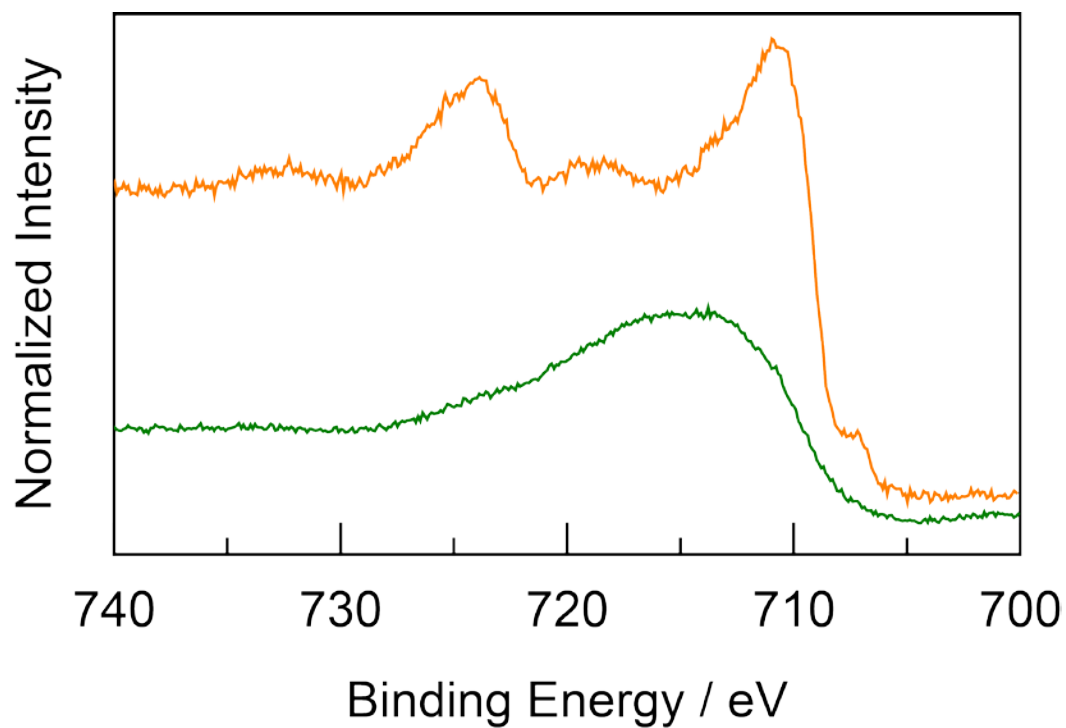

**Figure S7.** High-resolution XPS spectra in the Fe 2p region for CoFePbOx (dark green —) compared to a Fe<sub>2</sub>O<sub>3</sub> control (orange —). The peak for CoFePbOx is assigned to Sn 3p<sub>3/2</sub> from the underlying FTO substrate.

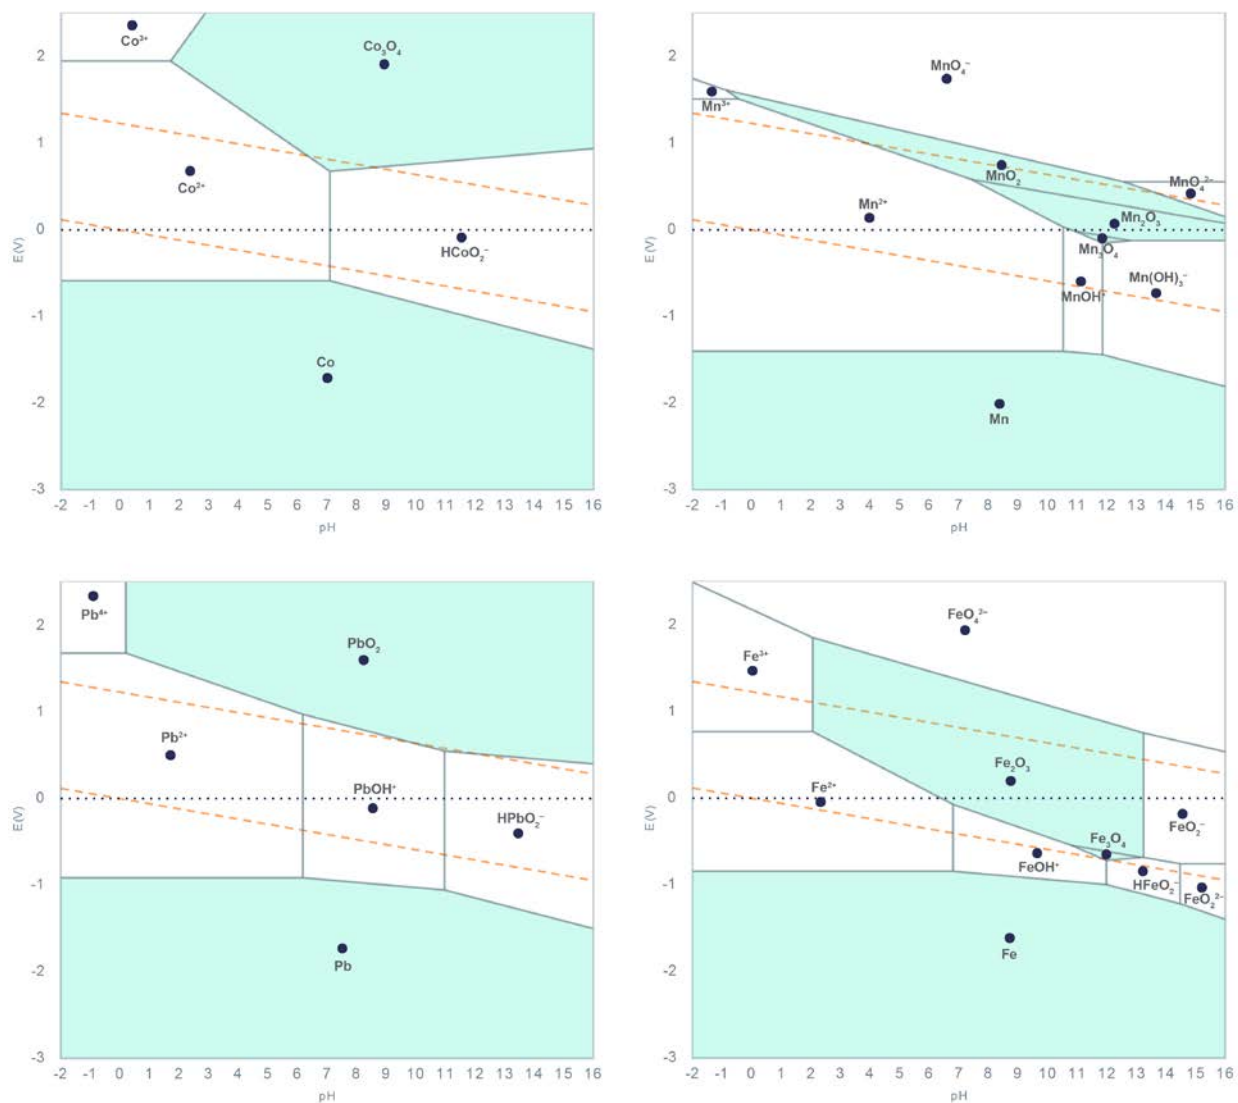

**Figure S8.** Pourbaix diagrams of Co, Mn, Pb, and Fe oxides generated from the Materials Project.<sup>1</sup>

<sup>1</sup> Jain, A.; Ong, S. P.; Hautier, G.; Chen, W.; Richards, W. D.; Dacek, S.; Cholia, S.; Gunter, D.; Skinner, D.; Ceder, G.; Persson, K. A. *APL Mater.* **2013**, *1*, 011002, materialsproject.org.

**Table S1.** Elemental analysis of CoMnOx, CoPbOx, and CoFePbOx films.

| <b>Sample</b>                | <b>Technique<sup>b</sup></b> | <b>Co %</b> | <b>Mn %</b> | <b>Pb %</b> | <b>Fe %</b> |
|------------------------------|------------------------------|-------------|-------------|-------------|-------------|
| CoMnOx (0.65 V) <sup>a</sup> | EDS                          | 39          | 61          | 0           | 0           |
| CoMnOx (0.90 V)              | EDS                          | 50          | 50          | 0           | 0           |
|                              | ICP-MS                       | 51          | 49          | 0           | 0           |
| CoMnOx (1.15 V)              | EDS                          | 83          | 17          | 0           | 0           |
| CoPbOx                       | ICP-MS                       | 18          | 0           | 82          | 0           |
| CoFePbOx                     | ICP-MS                       | 15          | 0           | 83          | 2           |

<sup>a</sup> Deposition potential of the mixed metal film. <sup>b</sup> EDS denotes energy dispersive X-ray spectrometer employed during scanning electron microscopy. ICP-MS denotes inductively coupled plasma mass spectrometry.
